# Supplementary material
Source: MDPI journal article supplement (https://www.mdpi.com/2073-4433/13/5/842)
Supplement: s1 [file s1]

## Supplemental Material

# Effect of COVID-19 response policy on air quality: a study in south China context

Xiaodan Jin <sup>1,2,†</sup>, Hao Xu <sup>3,4,†</sup>, Meixiu Guo <sup>5</sup>, Jinmin Luo <sup>5</sup>, Qiyin Deng <sup>6</sup>, Yamei Yu <sup>7</sup>, Jiemin Wu <sup>2</sup>,  
Huarui Ren <sup>3</sup>, Xue Hu <sup>3,8</sup>, Linping Fan <sup>3</sup>, Guimei Qin <sup>3,8</sup> and Jinping Cheng <sup>3,\*</sup>

<sup>1</sup> China Institute for Urban Governance, Shanghai Jiao Tong University, Shanghai 200030, China

<sup>2</sup> Environmental Protection Research Institute of Guangxi, Nanning 530022, China

<sup>3</sup> School of Environmental Science and Engineering, Shanghai Jiao Tong University, Shanghai  
200240, China

<sup>4</sup> Tianjin Research Institute for Water Transport Engineering, Ministry of Transport, Tianjin 300456,  
China

<sup>5</sup> Beihai Ecological and Environment Bureau, Beihai 536000, Guangxi Province, China

<sup>6</sup> School of Environment, Hohai University, Nanjing 210000, China

<sup>7</sup> Shanghai Environmental Monitoring Center, Shanghai 201306, China

<sup>8</sup> China-UK Low Carbon College, Shanghai Jiao Tong University, Shanghai 200240, China

\* Correspondence: [jpcheng@sjtu.edu.cn](mailto:jpcheng@sjtu.edu.cn); Tel.: +86-21-5474-3926; Fax: +86-21-5474-3936

† These authors contributed equally to this work, they are co-first authors of this paper.

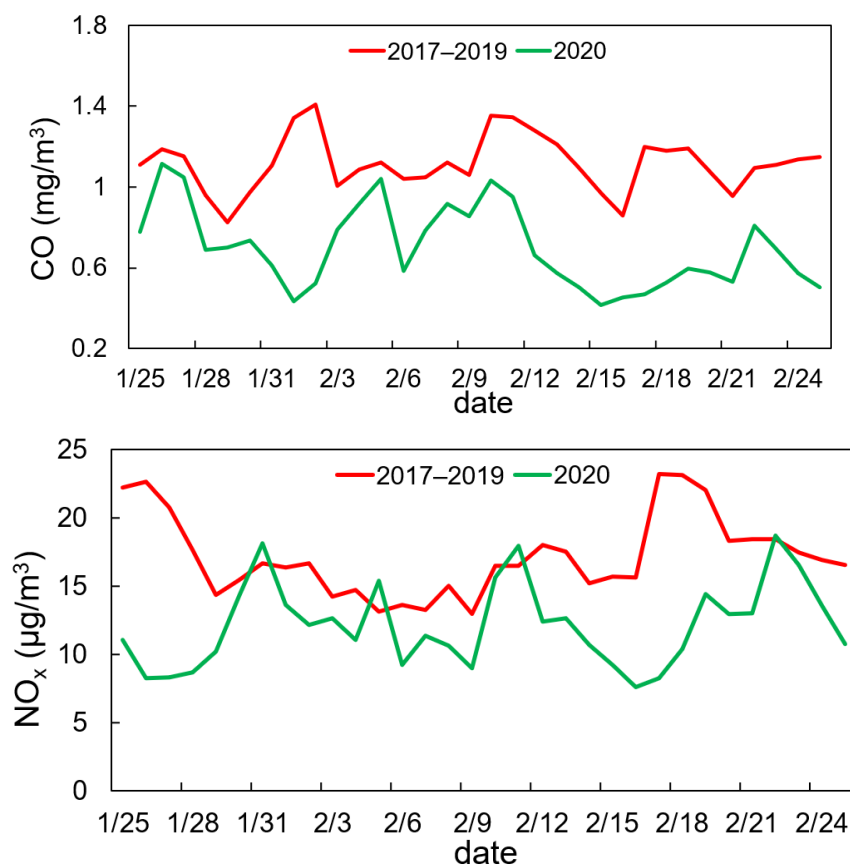

**Figure S1.** Daily CO and NO<sub>x</sub> mean concentrations of all four stations in Beihai between 25 January and 25 February averaged over previous three years (2017–2019, red line) and in 2020 (the COVID-19 lockdown).

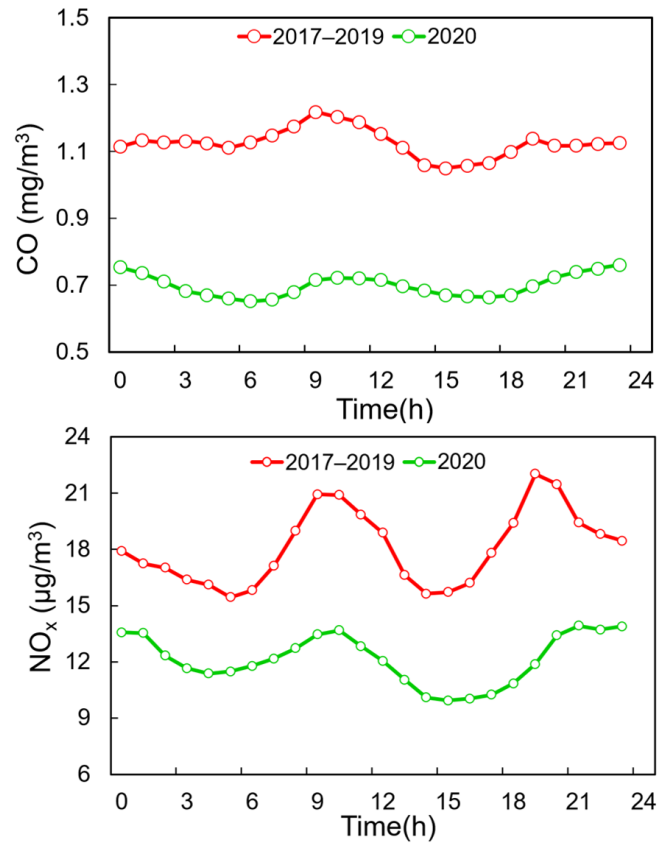

**Figure S2.** Diurnal variation of CO and NO<sub>x</sub> concentrations Beihai in Beihai between 25 January and 25 February averaged over previous three years (2017–2019, red line) and in 2020 (the COVID-19 lockdown).

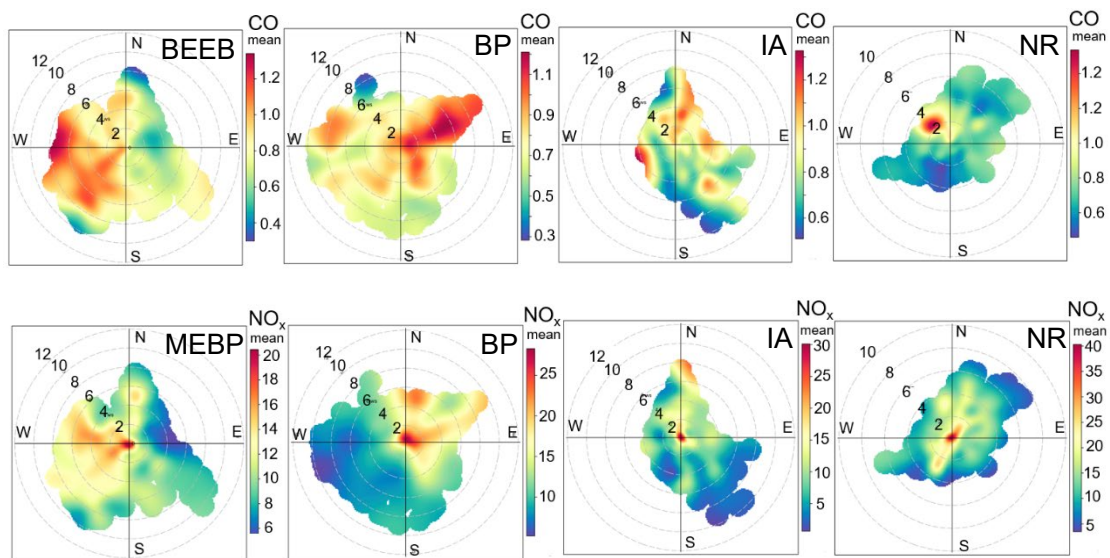

**Figure S3.** Bivariate polar plots of CO and NO<sub>x</sub> for four observation sites.

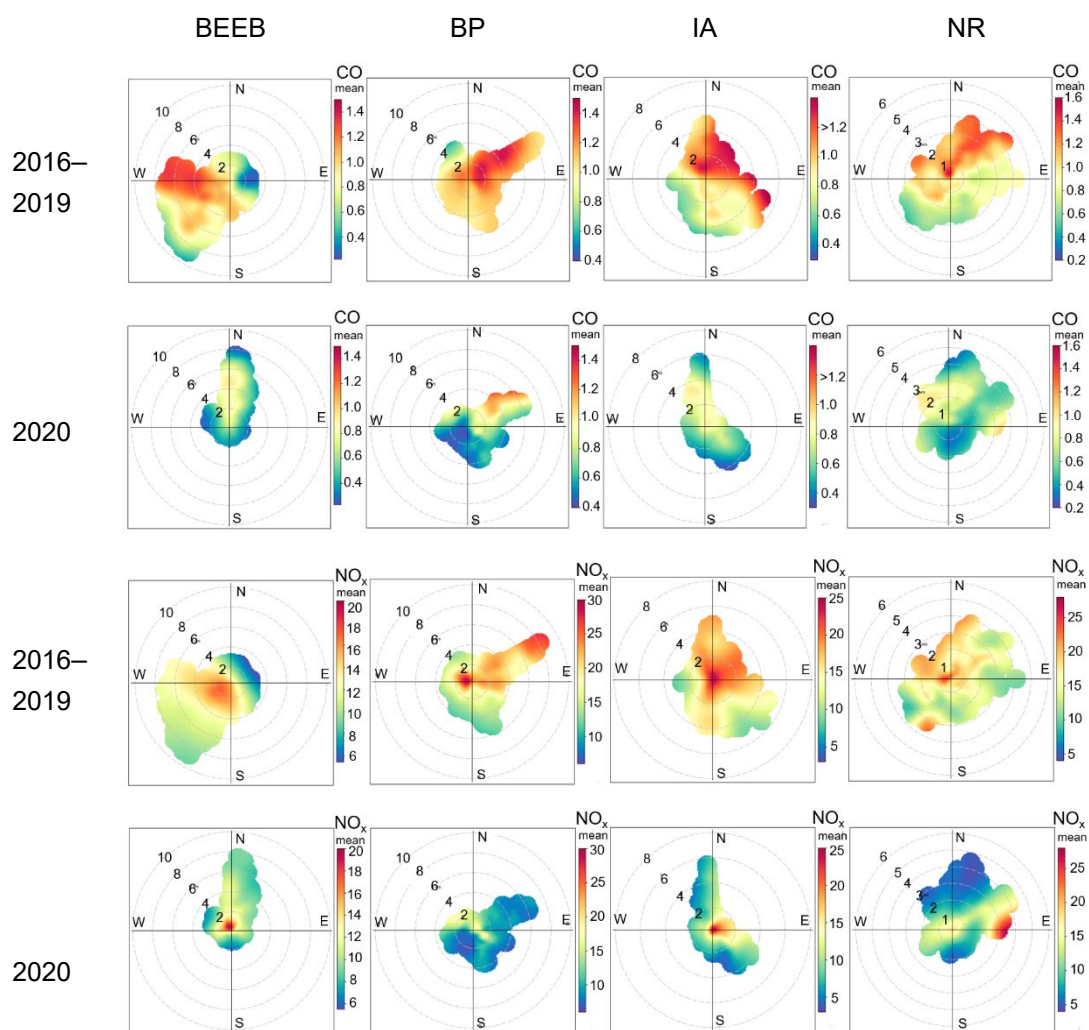

**Figure S4.** Bivariate polar plots of CO and NO<sub>x</sub> for four observation sites from 25 January to 25 February in 2017-2019 and in 2020.
